## Survival and energetic costs of repeated cold exposure in the Antarctic midge, *Belgica antarctica*: a comparison between frozen and supercooled larvae

Nicholas M. Teets, Yuta Kawarasaki, Richard E. Lee, Jr and David L. Denlinger

10.1242/jeb.060624

There was an error published in *J. Exp. Biol.* **214**, 806-814.

In calculating the metabolite levels (i.e. lipid, glycogen, trehalose, glucose and glycerol) and energy content values (Figs 2 and 3), an incorrect correction factor was applied in the last step of the calculation. The correct metabolite and energy content values can be obtained by multiplying the values that appear in the manuscript by a factor of 2.33. This correction applies to values both in the text and in Figs 2 and 3. The corrected versions of Figs 2 and 3 are presented below.

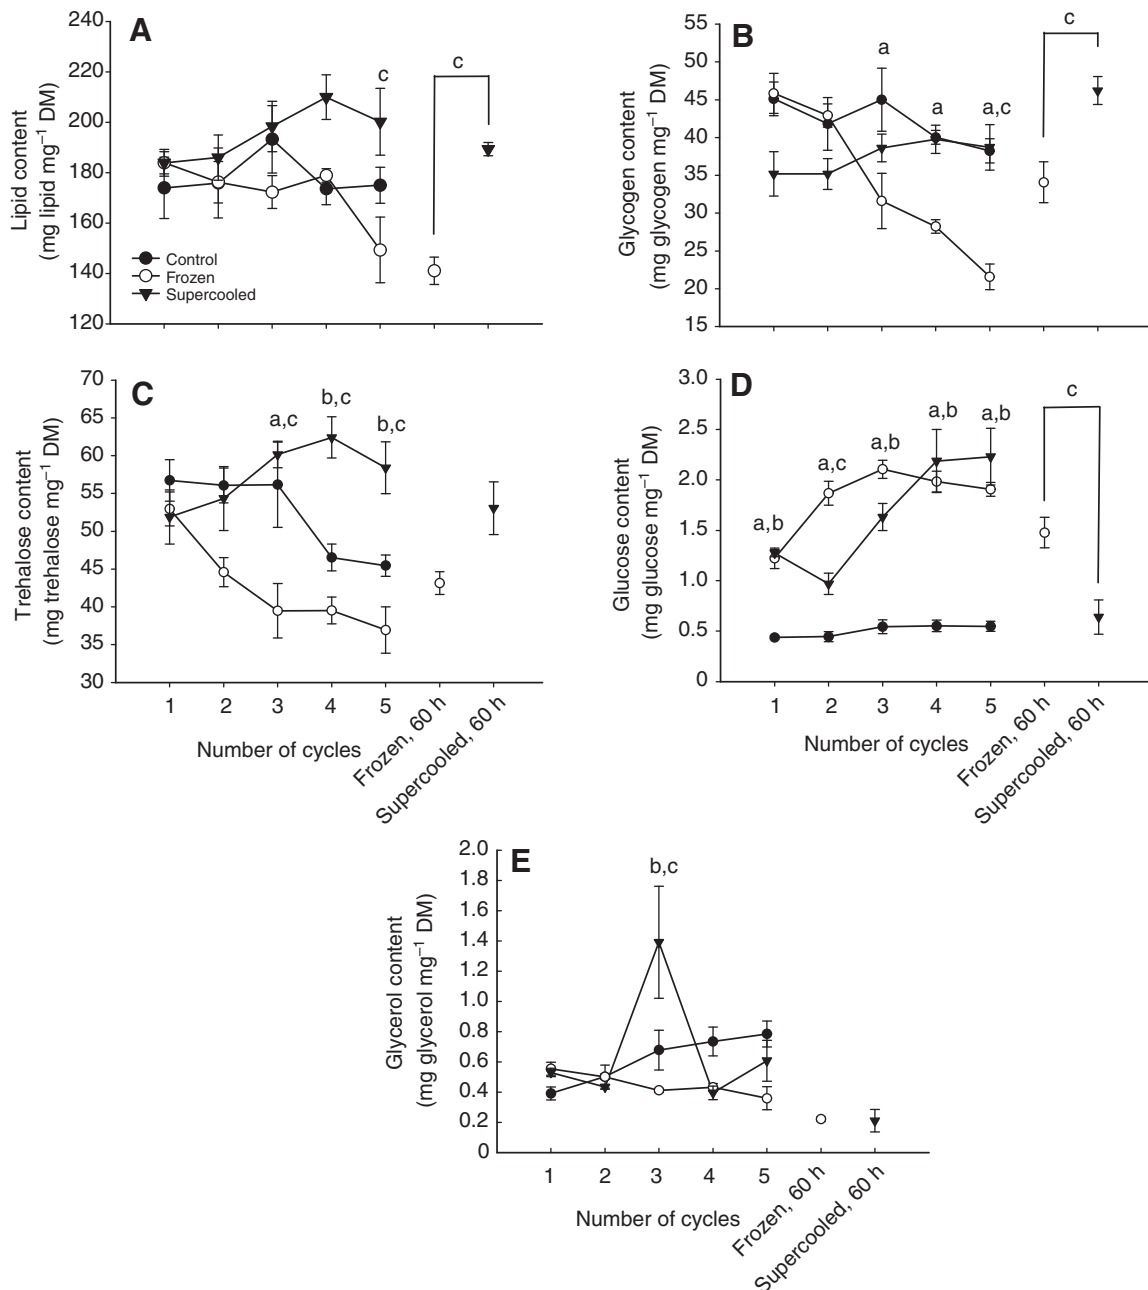

Fig. 2.

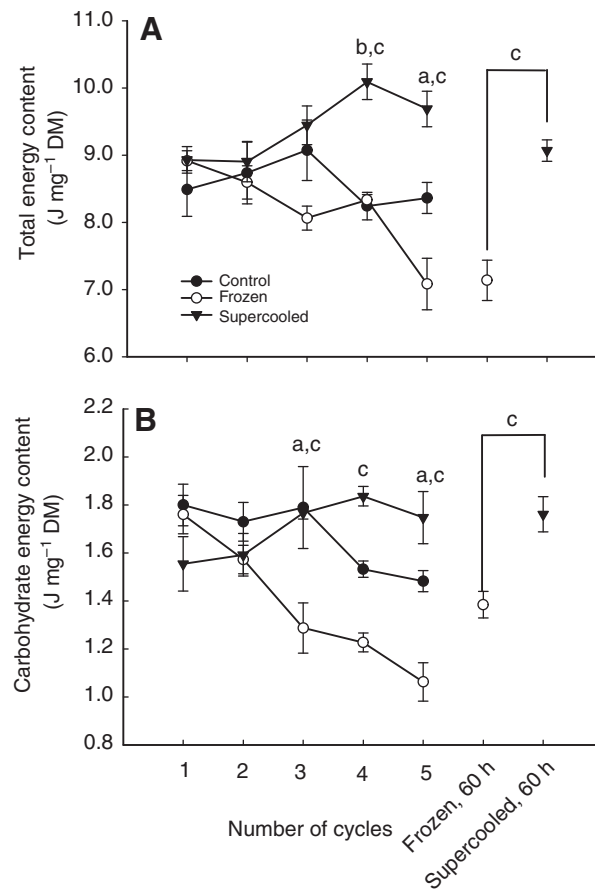

Fig. 3.

Note that this error does not alter the relative changes observed nor does it affect the results of the statistical tests. Thus, the interpretation of the results is not affected by this error.

The authors apologize for any inconvenience this error may have caused.
